# Supplementary material
Source: PubMed Central journal article supplement (PMC10527407)

**Supplemental Digital Content 1. Households with Infants enrolled in Study and Grouped by Community in the Trifinio Region of SW Guatemala, 2017-2019**

**Legend:** Household location of enrolled subjects, by community. Each dot represents a single household that completed the DMID 16-0057 study and was included in this secondary analysis. Each color represents a different community, which were compared to assess differences in cumulative illness burden by geolocation.

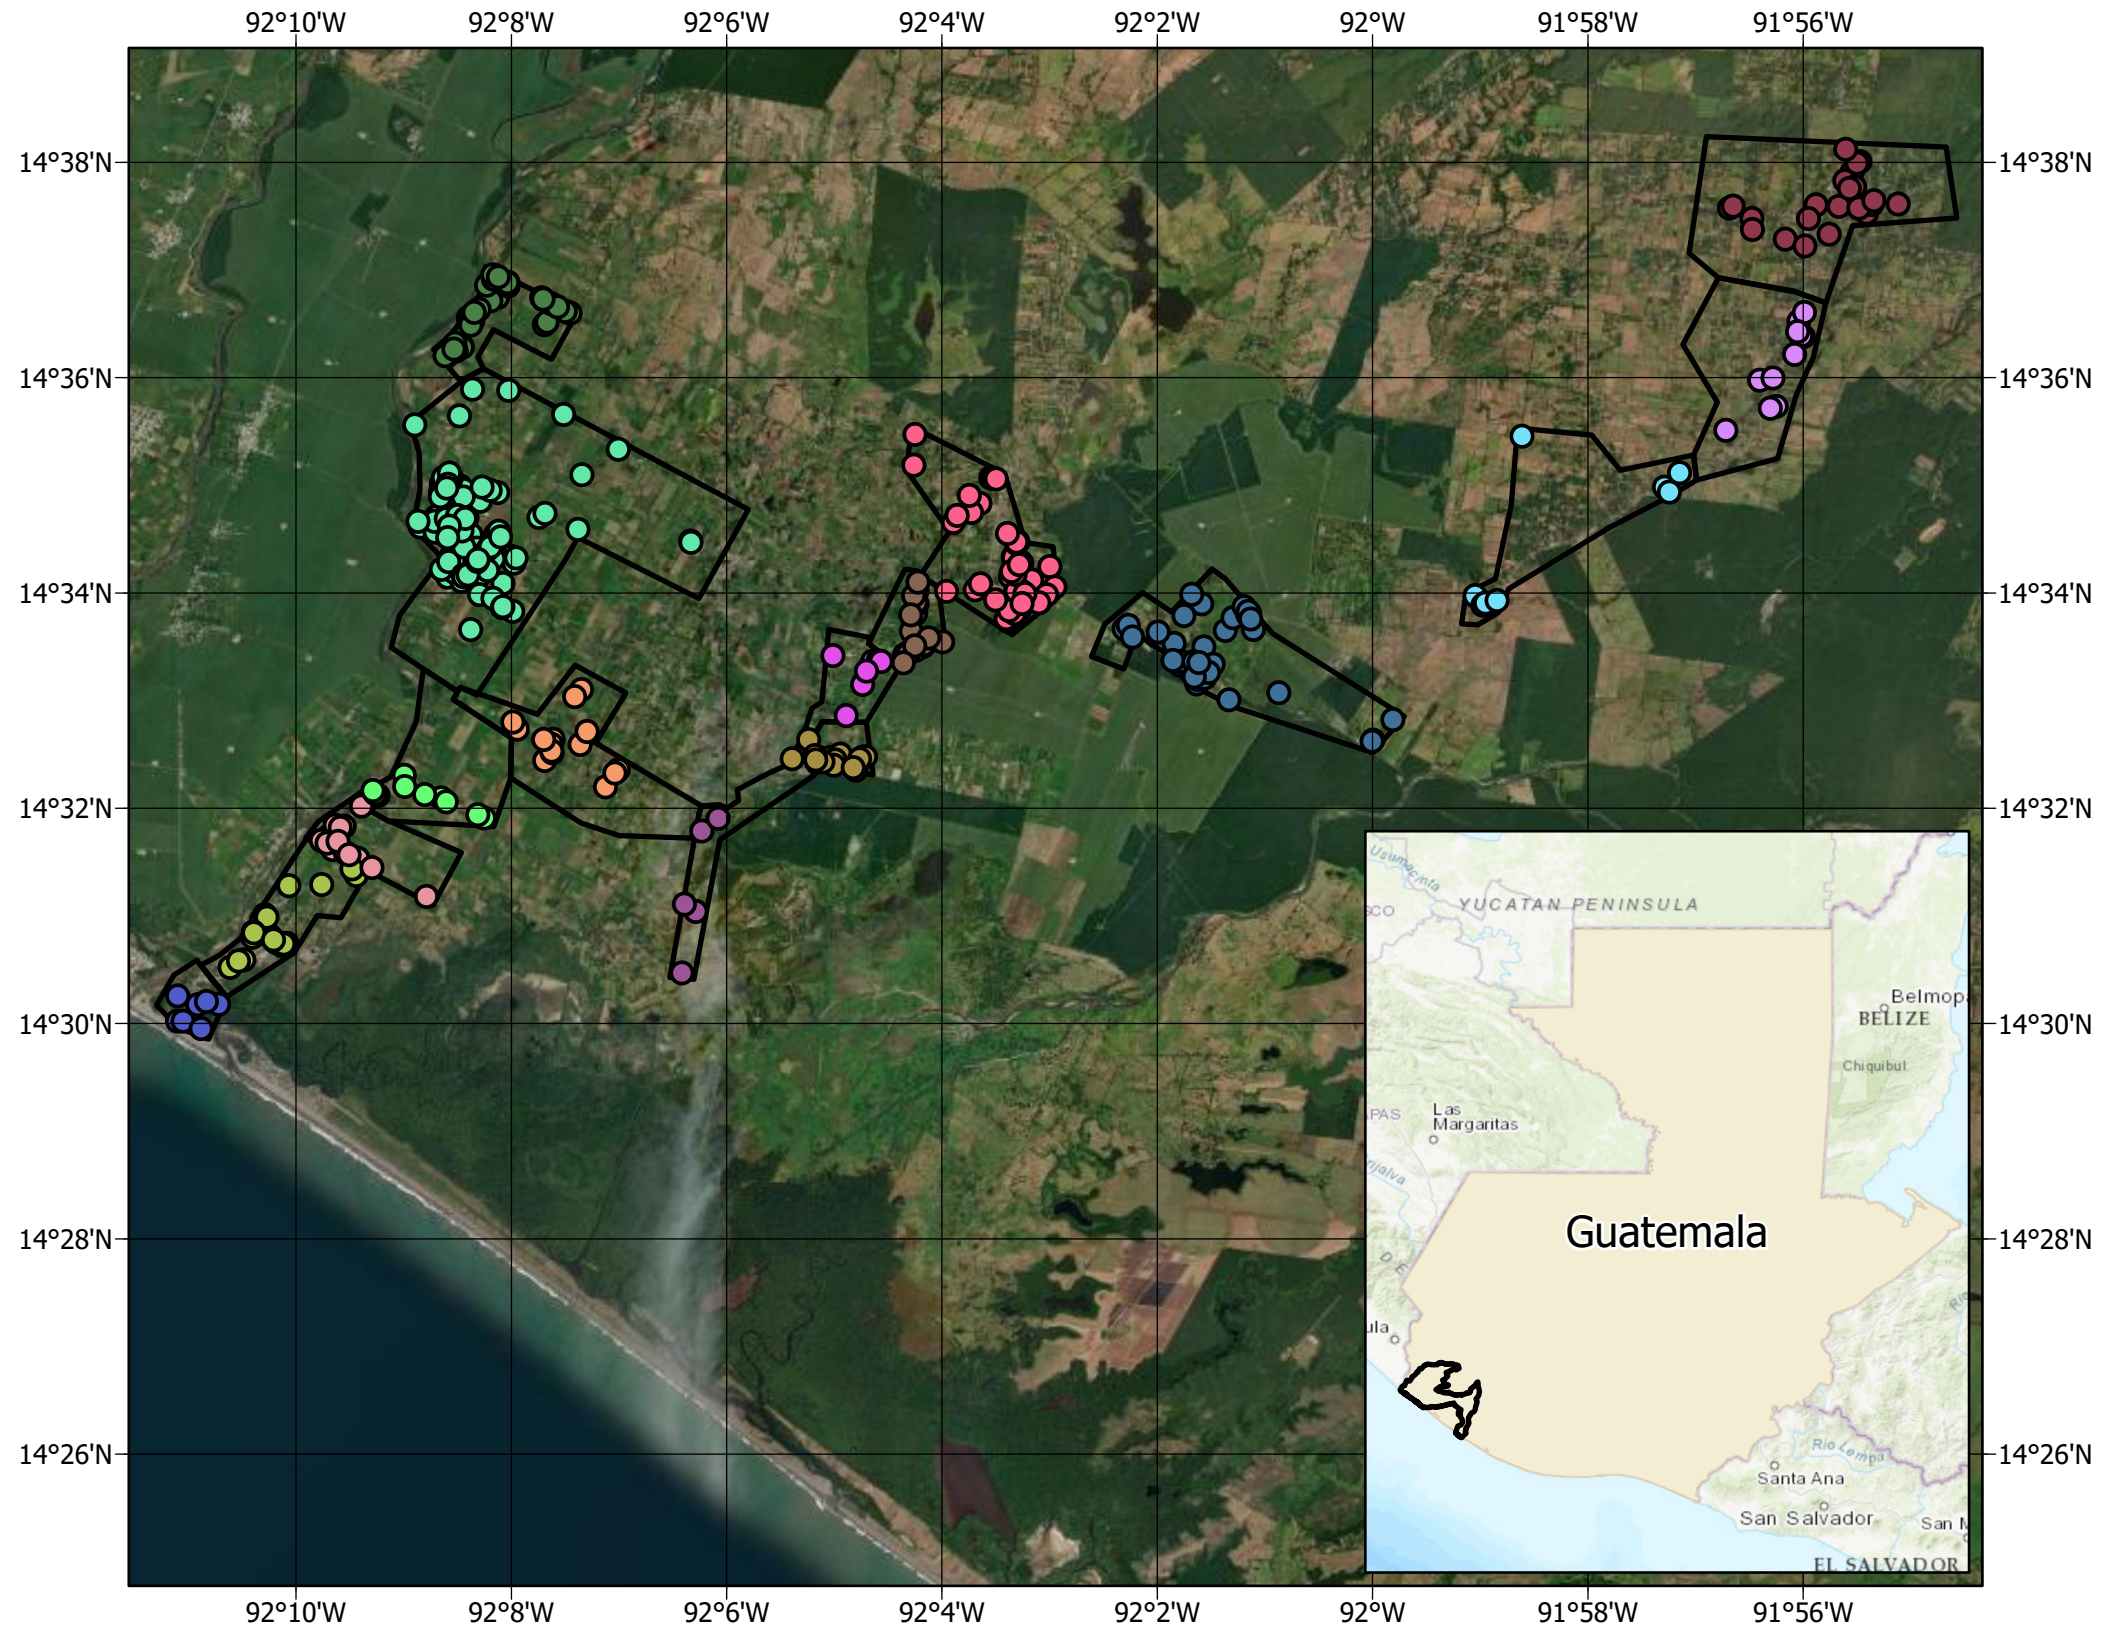

Supplement: NIHMS1907028-supplement-Supplemental_Digital_Content__Including_Separate_Legend__1.pdf [file NIHMS1907028-supplement-Supplemental_Digital_Content__Including_Separate_Legend__1.pdf]
