# Supplementary material
Source: PubMed Central journal article supplement (PMC10527407)

**Supplemental Digital Content 2. Cumulative Instances of Syndromic Illness by Community among Infants in the Trifinio Region of SW Guatemala, 2017-2019**

**Legend:** Mean instances (surveillance weeks) of cumulative illness by community for fever (Panel A), cough, (Panel B), diarrhea/vomiting (Panel C), or any illness (Panel D). Darker color indicates greater mean number of instances of reported illness. Asterisks indicate communities that had significantly greater disease burden than the overall mean (Mann Whitney U Test:  $p < 0.05$ ).

**A)**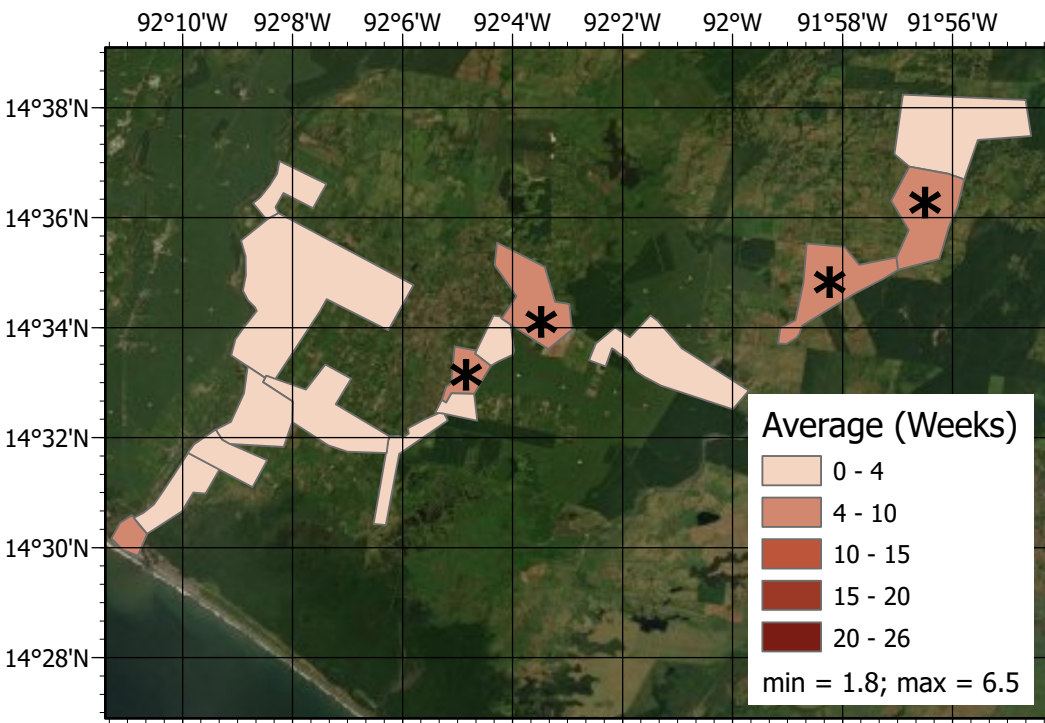**B)**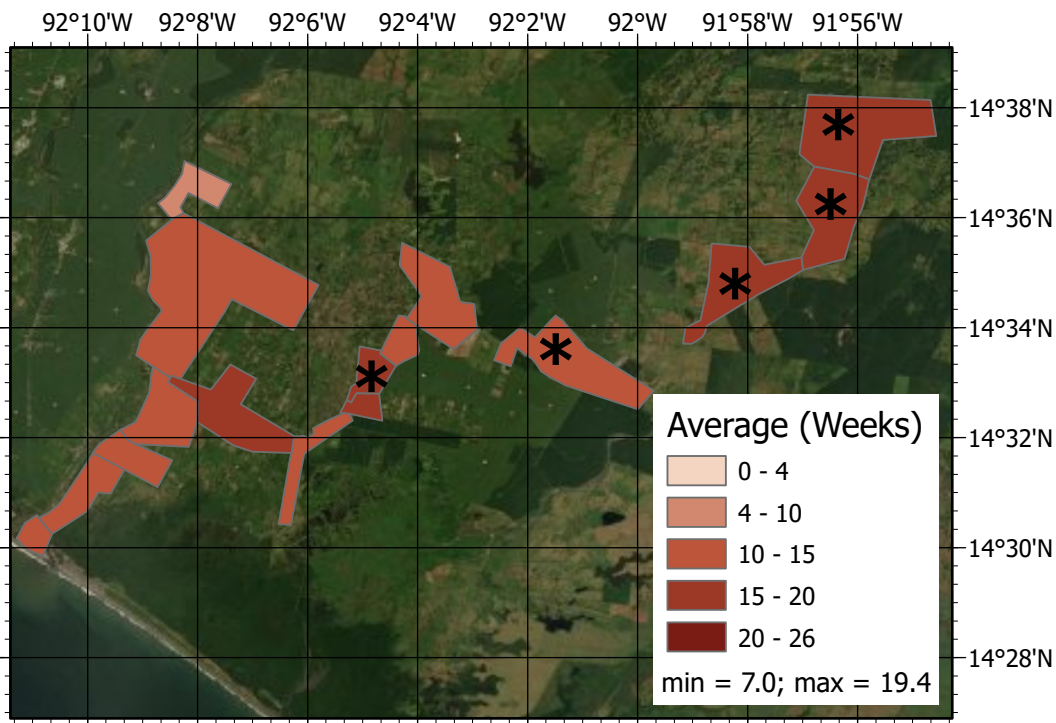**C)**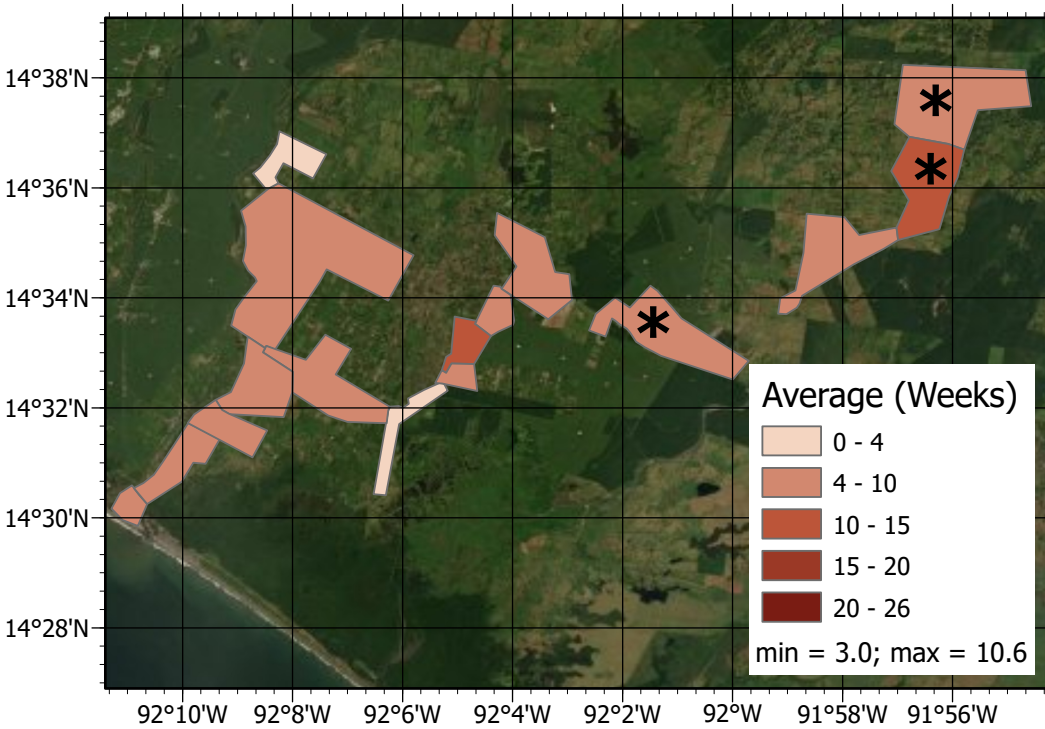**D)**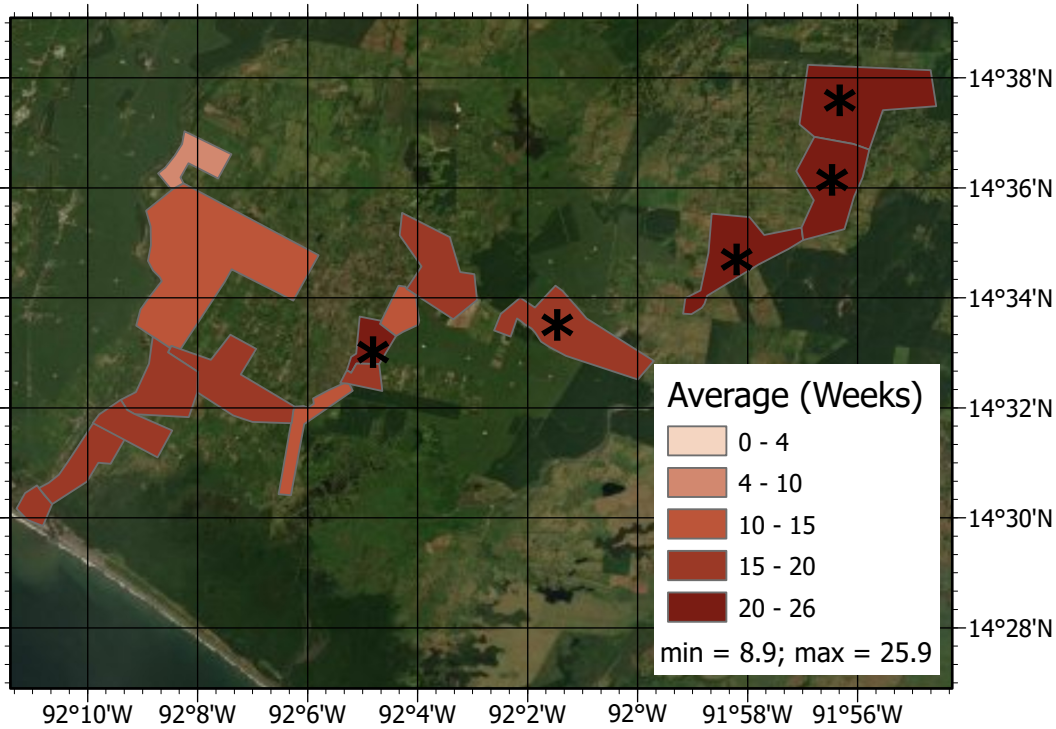

Supplement: NIHMS1907028-supplement-Supplemental_Digital_Content__Including_Separate_Legend__2.pdf [file NIHMS1907028-supplement-Supplemental_Digital_Content__Including_Separate_Legend__2.pdf]
